# Supplementary material for: Bacterial biosynthesis of nanosilver: a green catalyst for the synthesis of (amino pyrazolo)-(phenyl)methyl naphth-2-ol derivatives and their antimicrobial potential
Source: Royal Society of Chemistry journal article supplement (doi:10.1039/d0nj01924k), 2020-01-01
Supplement: d0nj01924k1.pdf [file d0nj01924k1.pdf]

### Supporting information

#### **Bacterial biosynthesis of nanosilver: A green catalyst for the synthesis of (amino pyrazolo) - (Phenyl) methyl naphth-2-ol derivatives and their antimicrobial potential**

Ganji Praveena,<sup>a,c</sup> Swetha Yagnam,<sup>b,c</sup> Linga Banoth,<sup>a,c</sup> Rajiv Trivedi,<sup>\*b,c</sup> Reddy Shetty Prakasham<sup>\*a,c</sup>,

<sup>a</sup> *Organic Synthesis and Process Chemistry, CSIR-Indian Institute of Chemical Technology, Hyderabad 500007, Telangana, India*

<sup>b</sup> *Catalysis and Fine Chemicals Division, CSIR-Indian Institute of Chemical Technology, Hyderabad 500007, Telangana, India*

<sup>c</sup> *Academy of Scientific and Innovative Research, AcSIR CSIR-IICT Campus, Hyderabad, 500007, Telangana, India*

*Correspondence to: Dr. R. S. Prakasham, Organic Synthesis and Process Chemistry, CSIR-Indian Institute of Chemical Technology (IICT), E-mail: [prakasam.iict@gov.in](mailto:prakasam.iict@gov.in), Organic Synthesis and Process Chemistry, Dr. Rajiv Trivedi, Catalysis and Fine Chemicals Division, CSIR-Indian Institute of Chemical Technology (IICT), Uppal Road, Tarnaka, Hyderabad, Telangana, 500007, India. E-mail: [trivedi@iict.res.in](mailto:trivedi@iict.res.in), [trivedi.iict@gov.in](mailto:trivedi.iict@gov.in)*

1) <sup>1</sup>H NMR and <sup>13</sup>C NMR of compound (4a-h) and HRMS of compound (4a-h) S2-S14

$^1\text{H}$  NMR (400 MHz,  $\text{CDCl}_3$ ,  $\text{Me}_4\text{Si}$ , ppm) of compound 4a

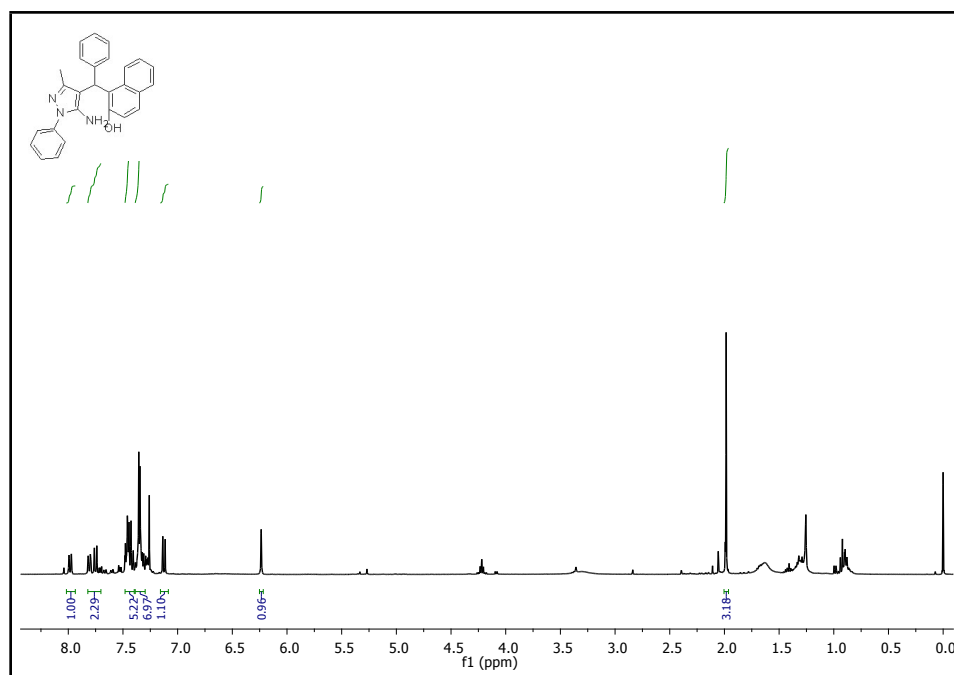

$^{13}\text{C}$  NMR (126 MHz,  $\text{CDCl}_3$ ) of compound 4a

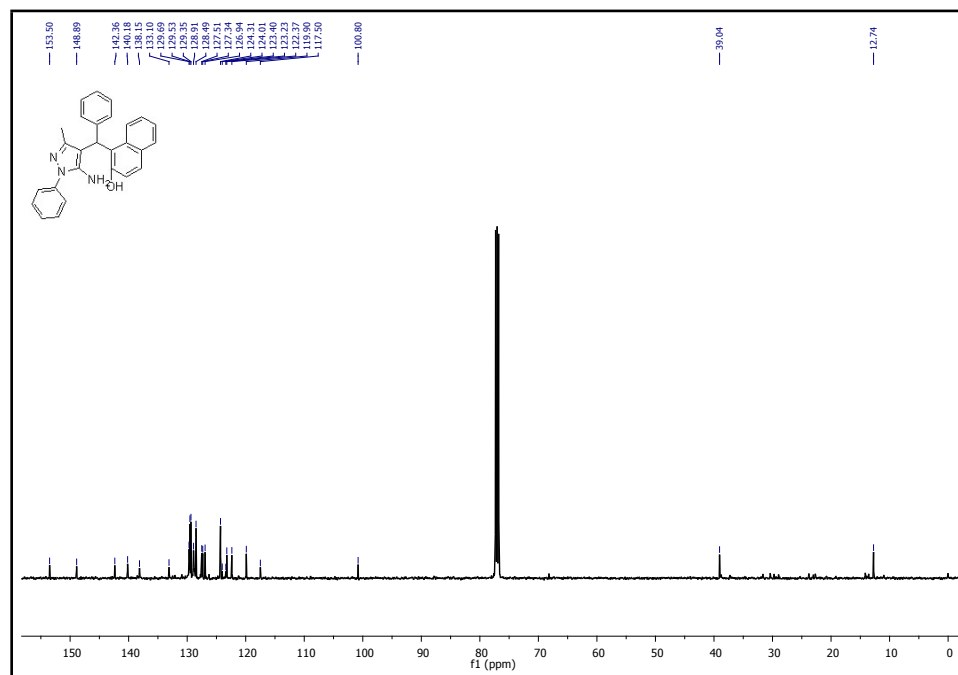

# HRMS of compound 4a

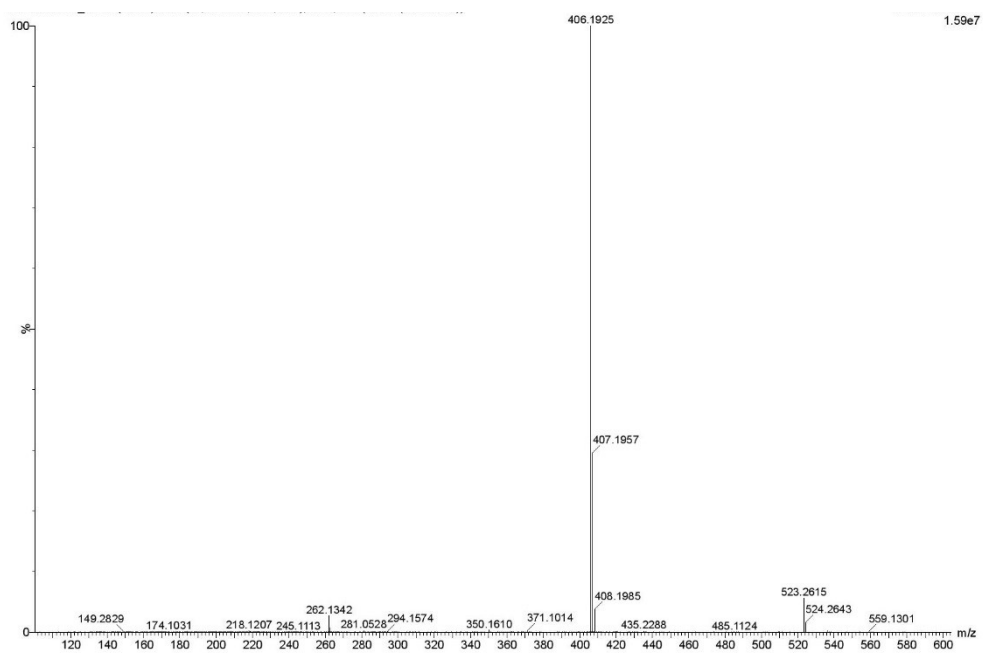

$^1\text{H}$  NMR (400 MHz,  $\text{CDCl}_3$ ,  $\text{Me}_4\text{Si}$ , ppm) of compound 4b

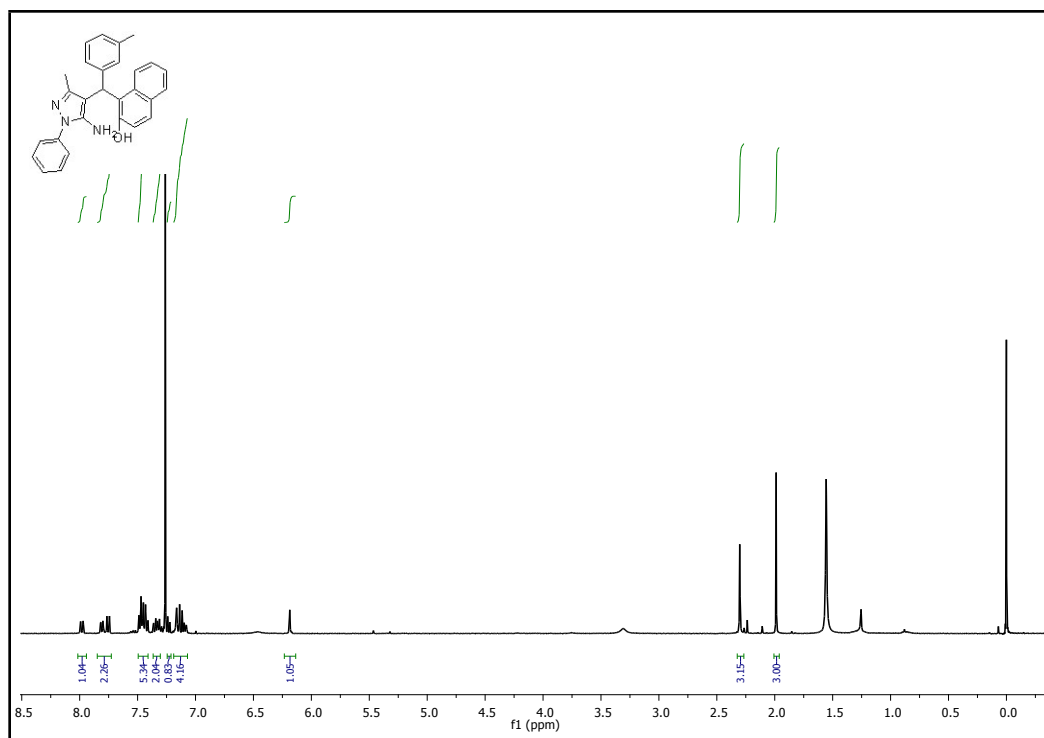

$^{13}\text{C}$  NMR (126 MHz,  $\text{CDCl}_3$ ) compound 4b

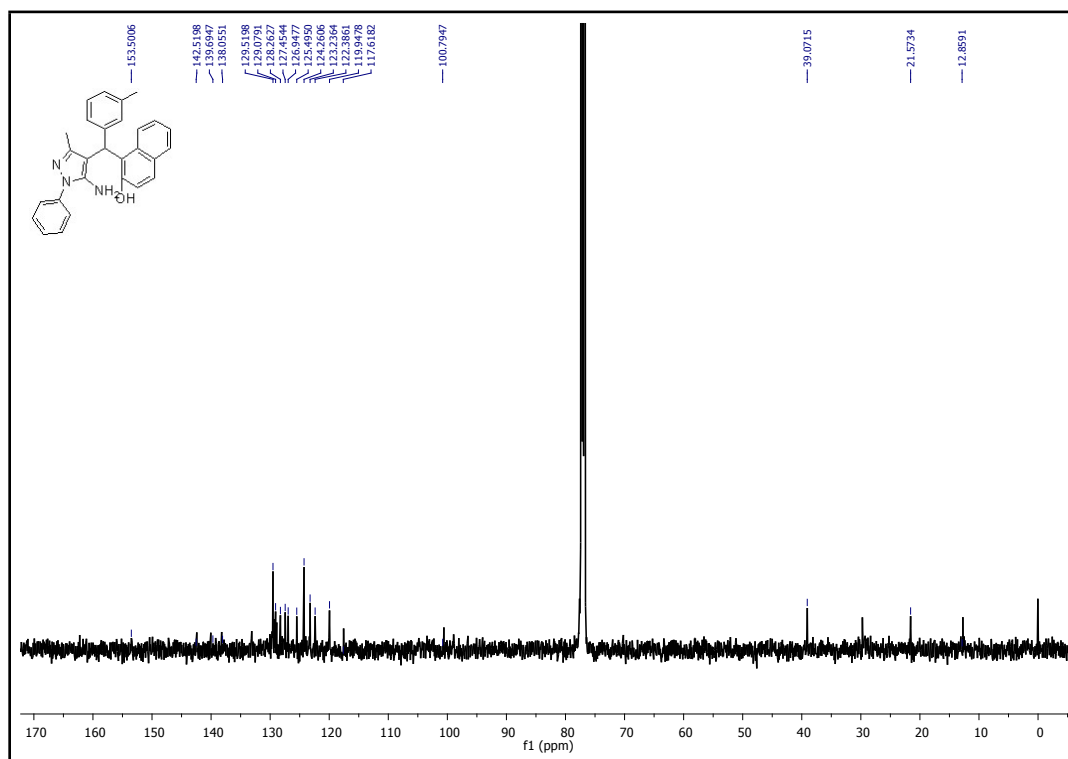

# HRMS of compound 4b

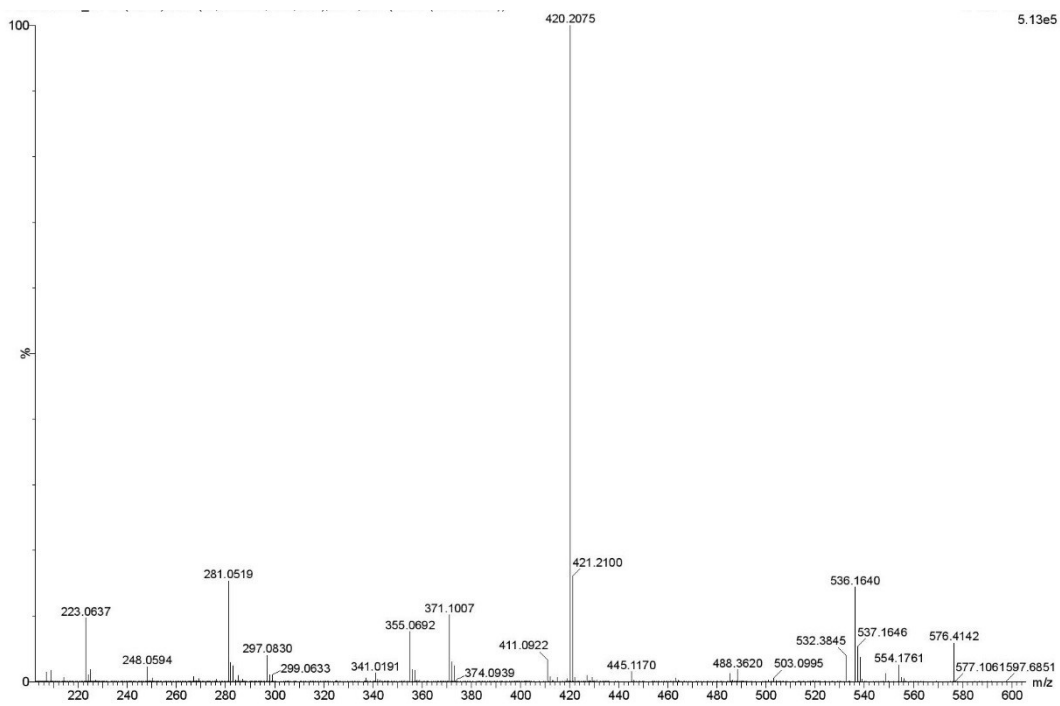

# <sup>1</sup>H NMR (400 MHz, CDCl<sub>3</sub>, Me<sub>4</sub>Si, ppm) compound 4c

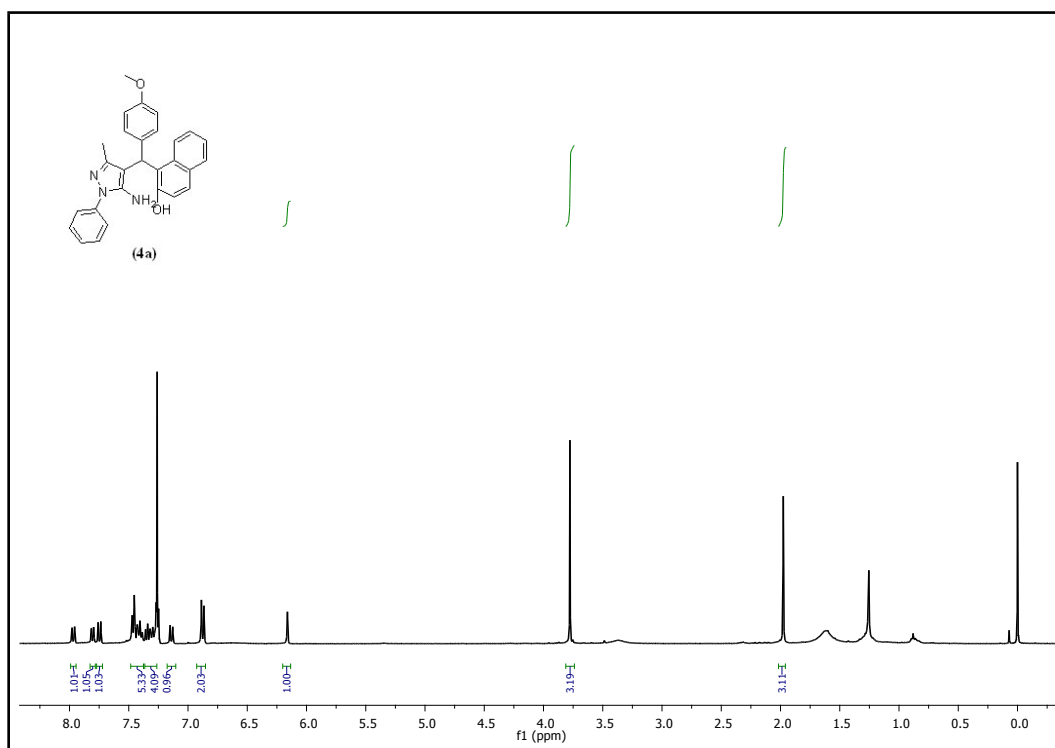

$^{13}\text{C}$  NMR (101 MHz,  $\text{CDCl}_3$ ) compound 4c

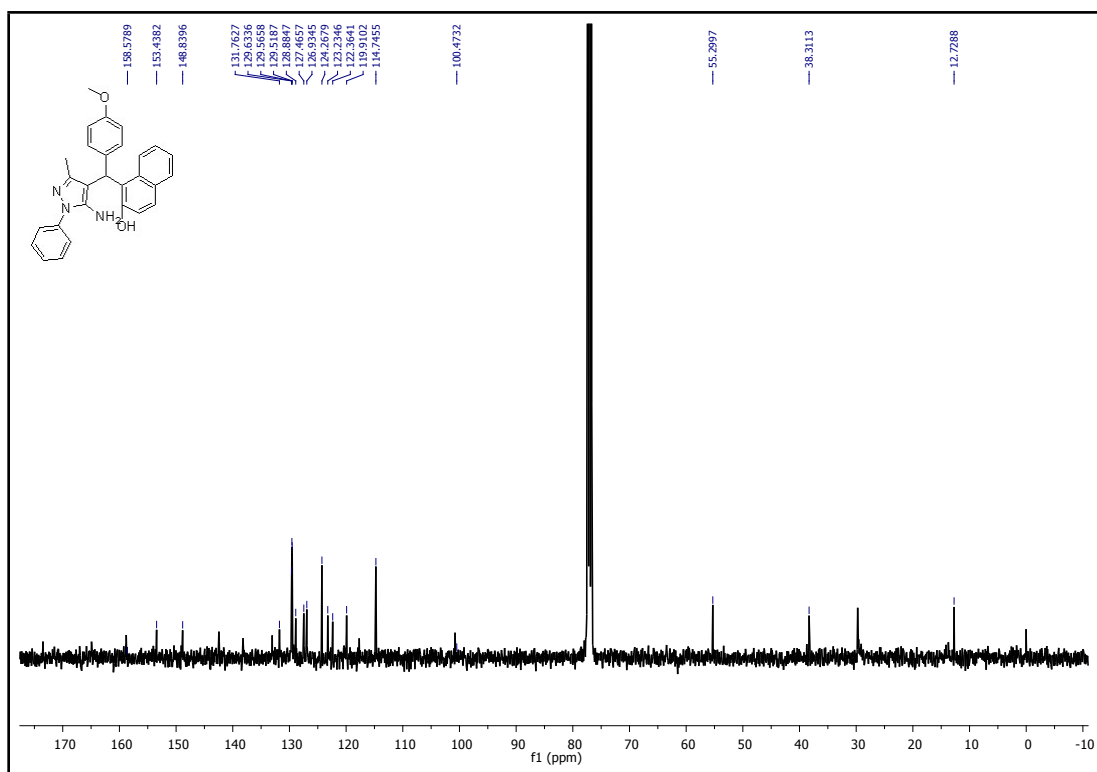

HRMS of compound 4c

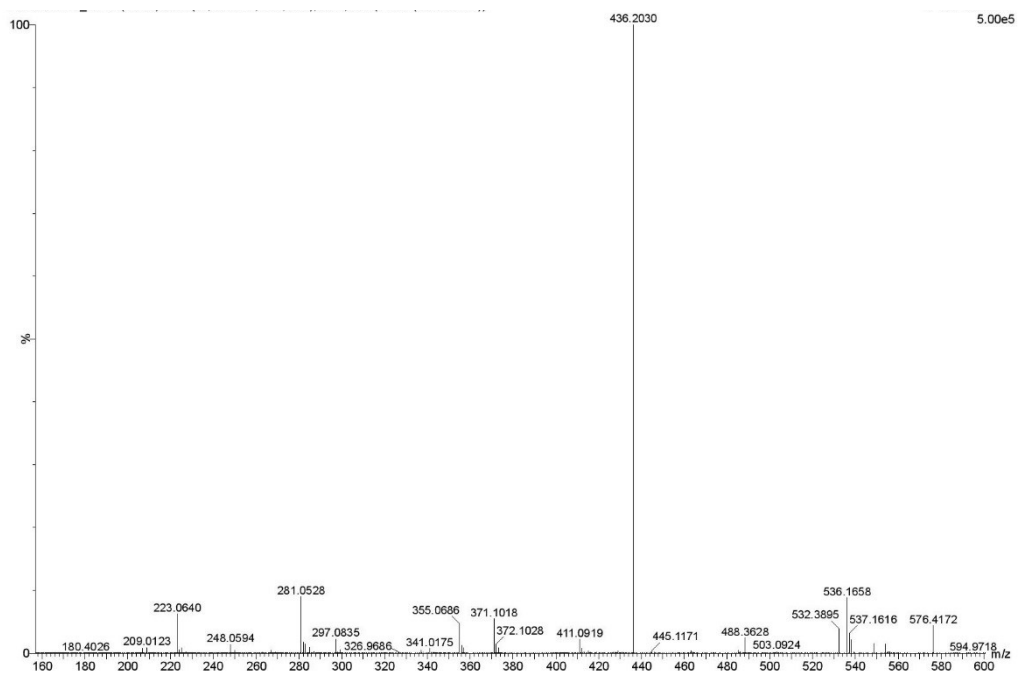

$^1\text{H}$  NMR (500 MHz,  $\text{CDCl}_3$ ,  $\text{Me}_4\text{Si}$ , ppm) of compound 4d

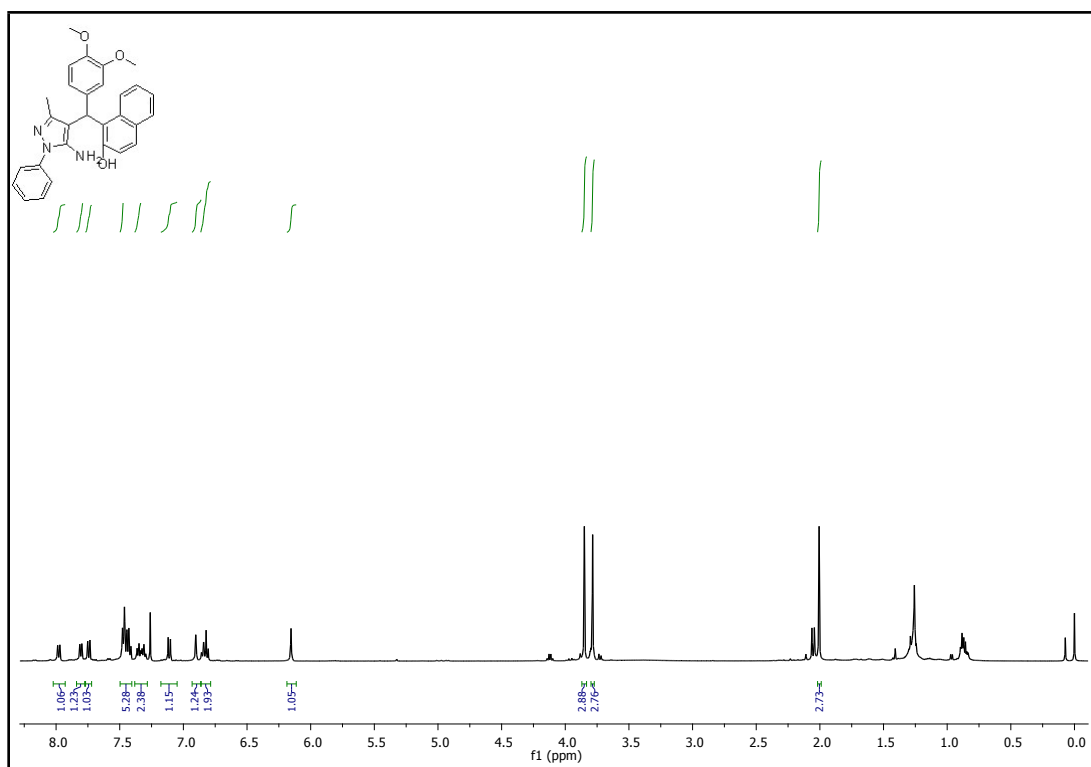

$^{13}\text{C}$  NMR (101 MHz,  $\text{CDCl}_3$ ) of compound 4d

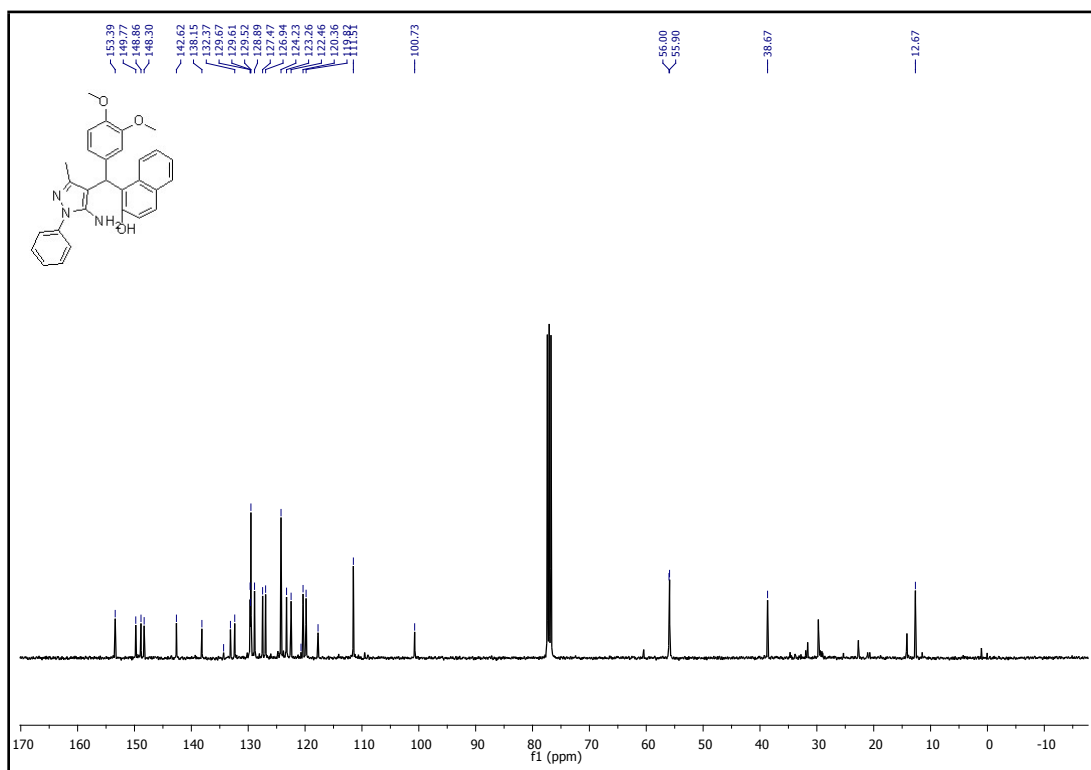

# HRMS of compound 4d

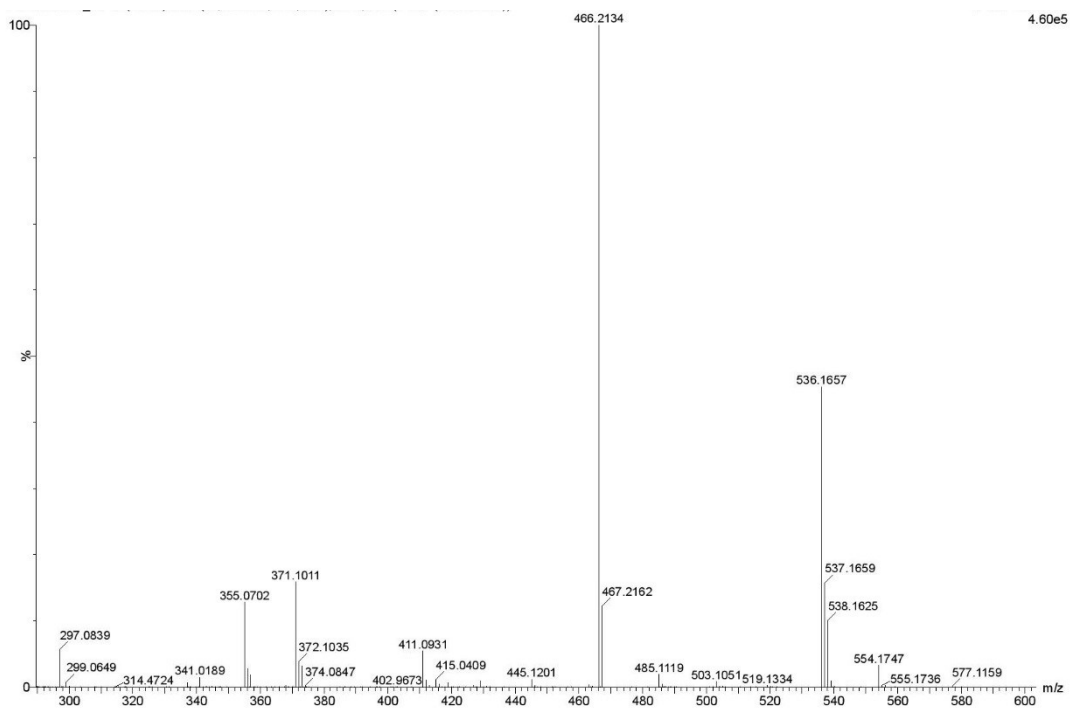

# <sup>1</sup>H NMR (400 MHz, CDCl<sub>3</sub>, Me<sub>4</sub>Si, ppm) of compound 4e

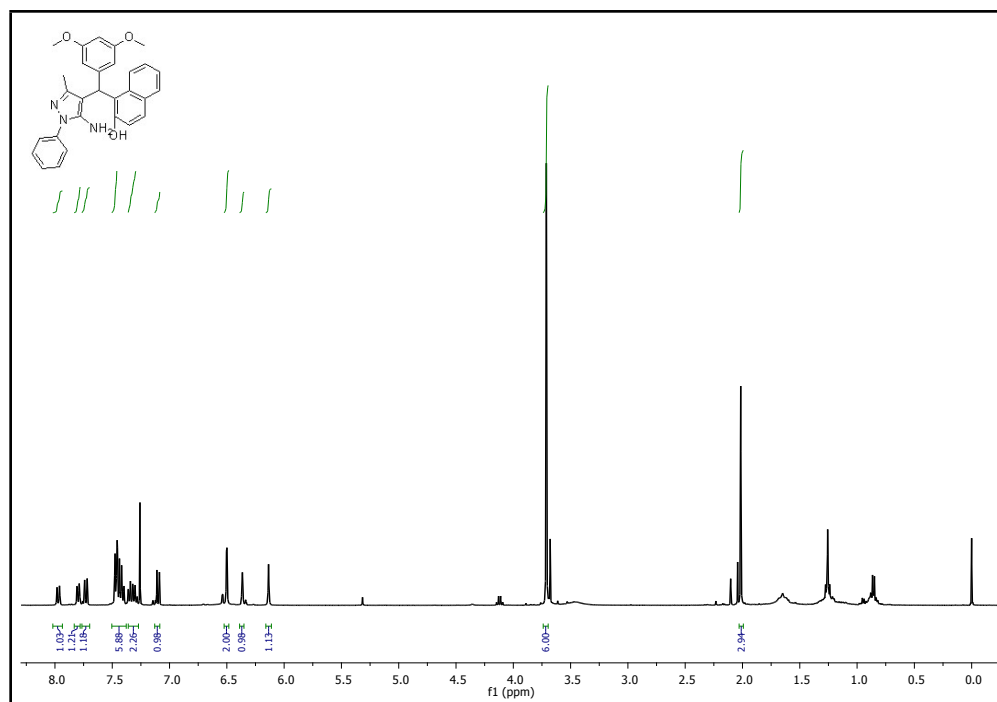



$^{13}\text{C}$  NMR (101 MHz,  $\text{CDCl}_3$ ) of compound 4e

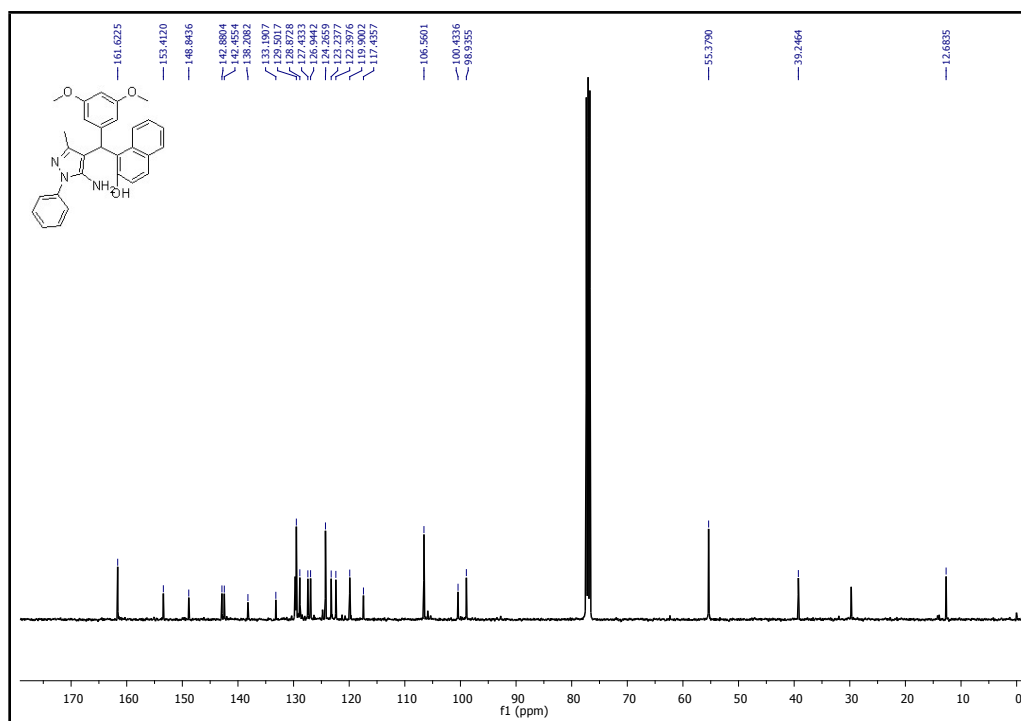

HRMS of compound 4e

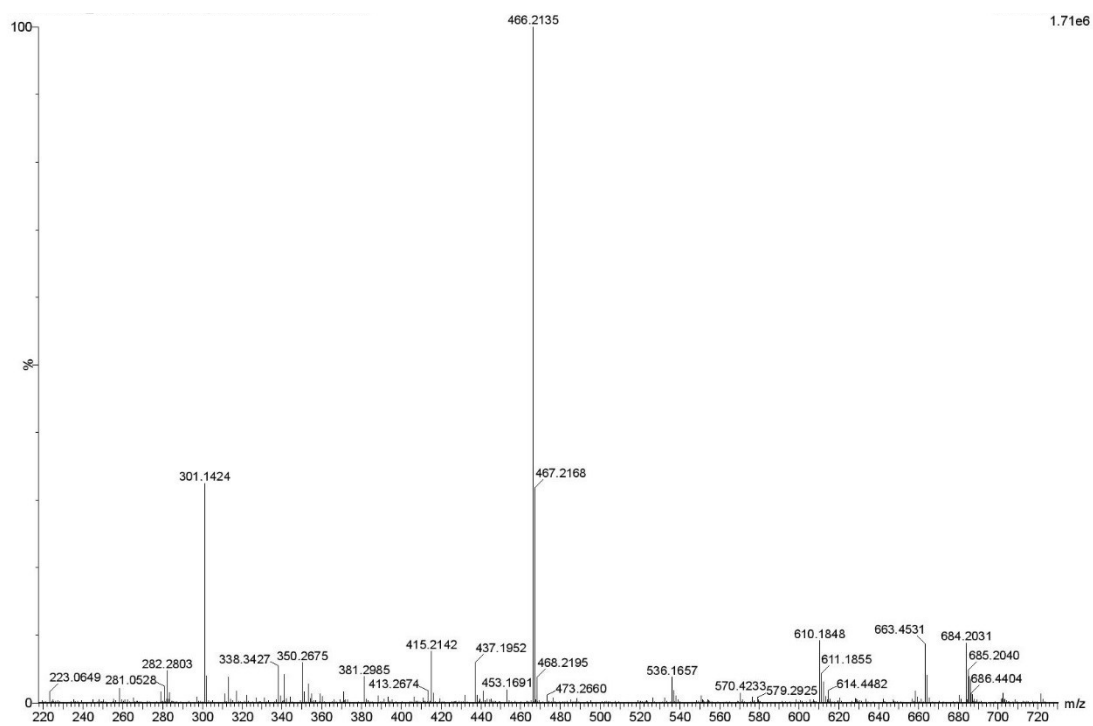

$^1\text{H}$  NMR (400 MHz,  $\text{CDCl}_3$ ,  $\text{Me}_4\text{Si}$ , ppm) of compound 4f

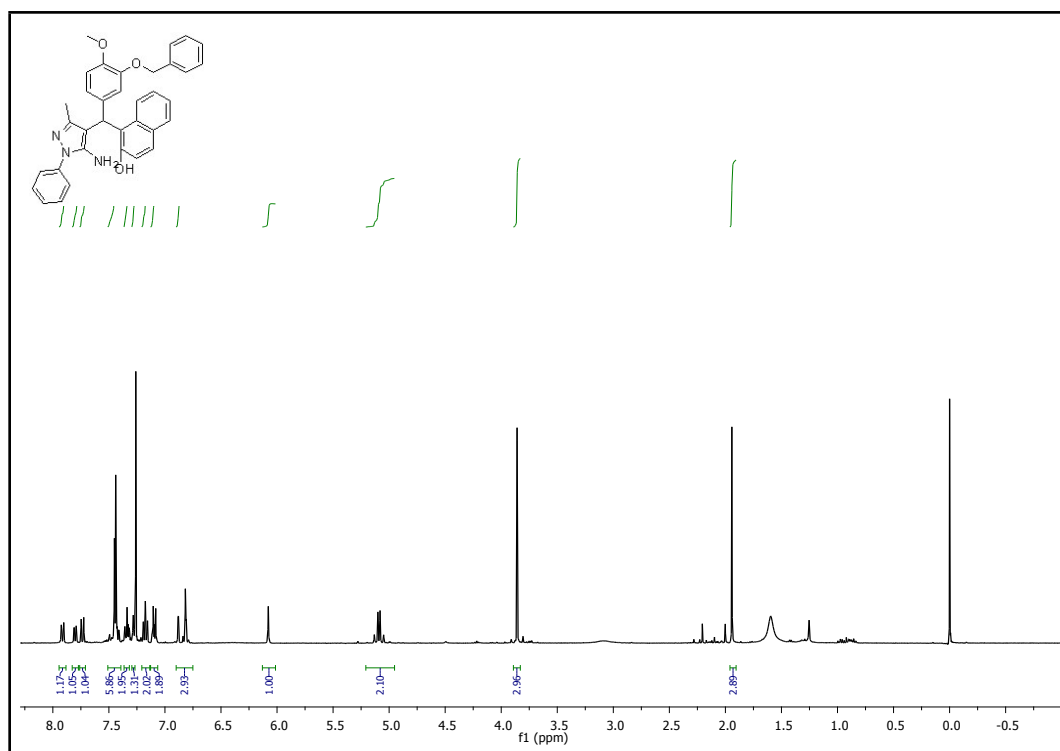

$^{13}\text{C}$  NMR (101 MHz,  $\text{CDCl}_3$ ) of compound 4f

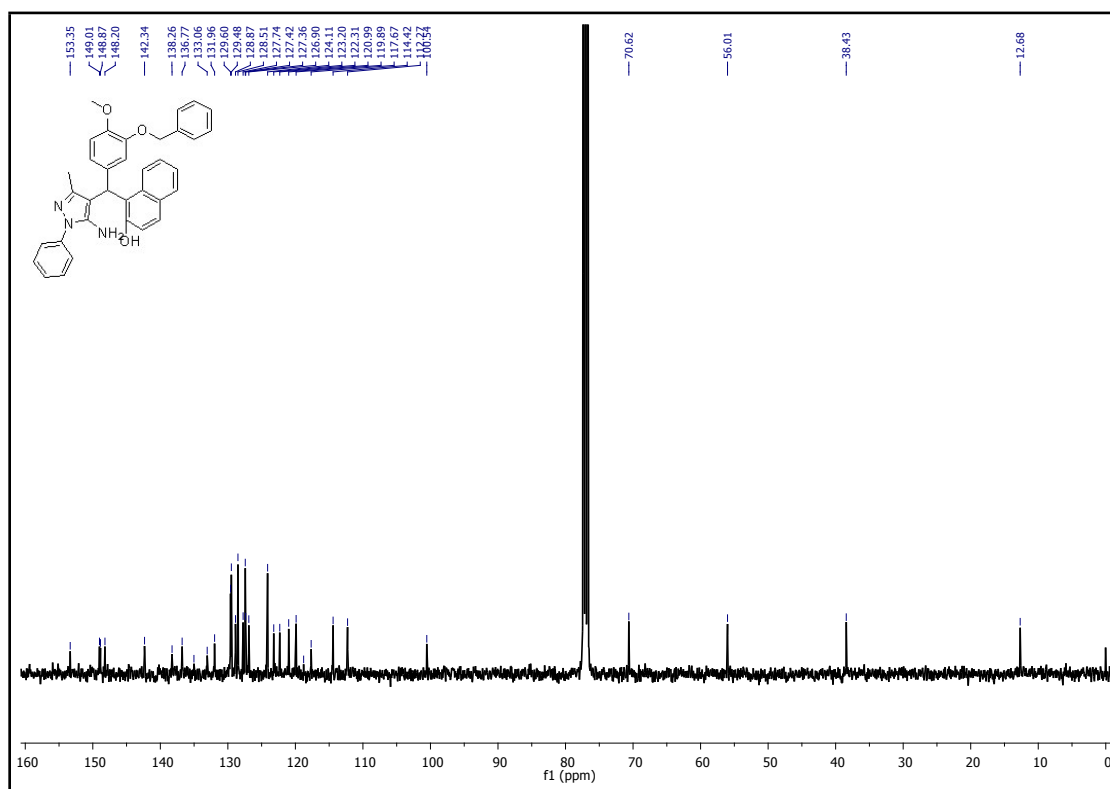

# HRMS of compound 4f

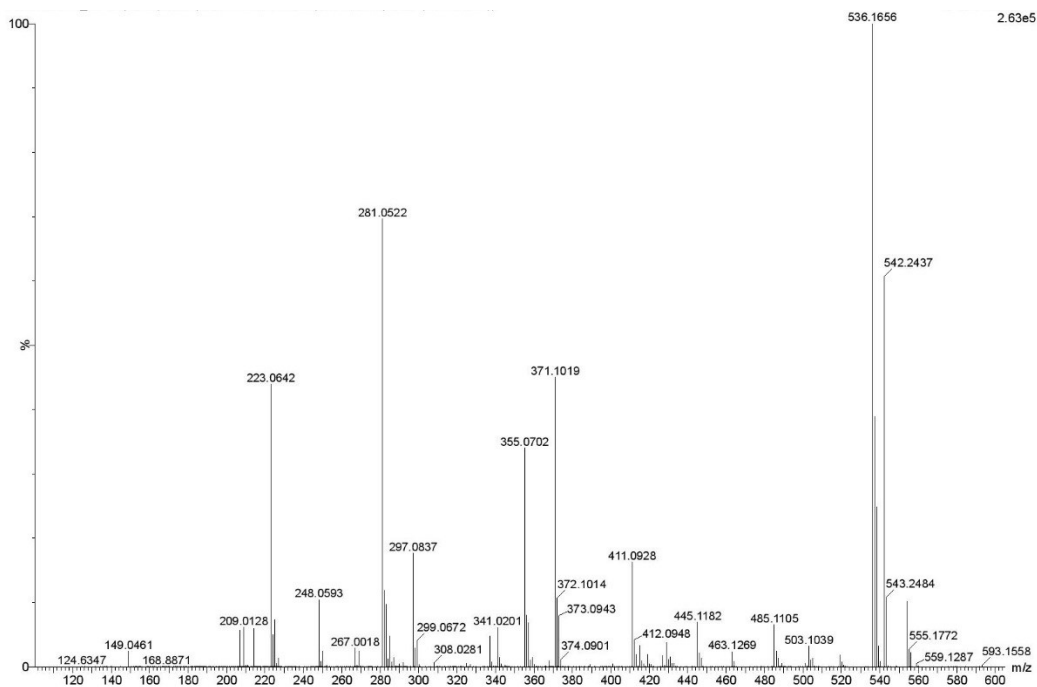

# <sup>1</sup>H NMR (500 MHz, CDCl<sub>3</sub>, Me<sub>4</sub>Si, ppm) of compound 4g

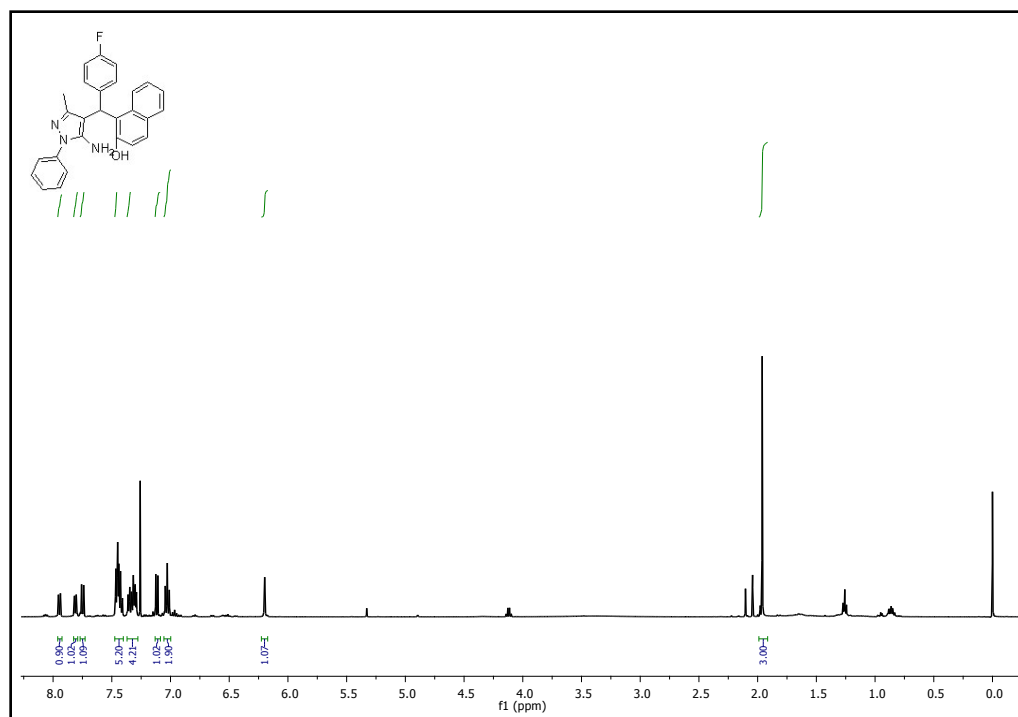

$^{13}\text{C}$  NMR (101 MHz,  $\text{CDCl}_3$ ) of compound 4g

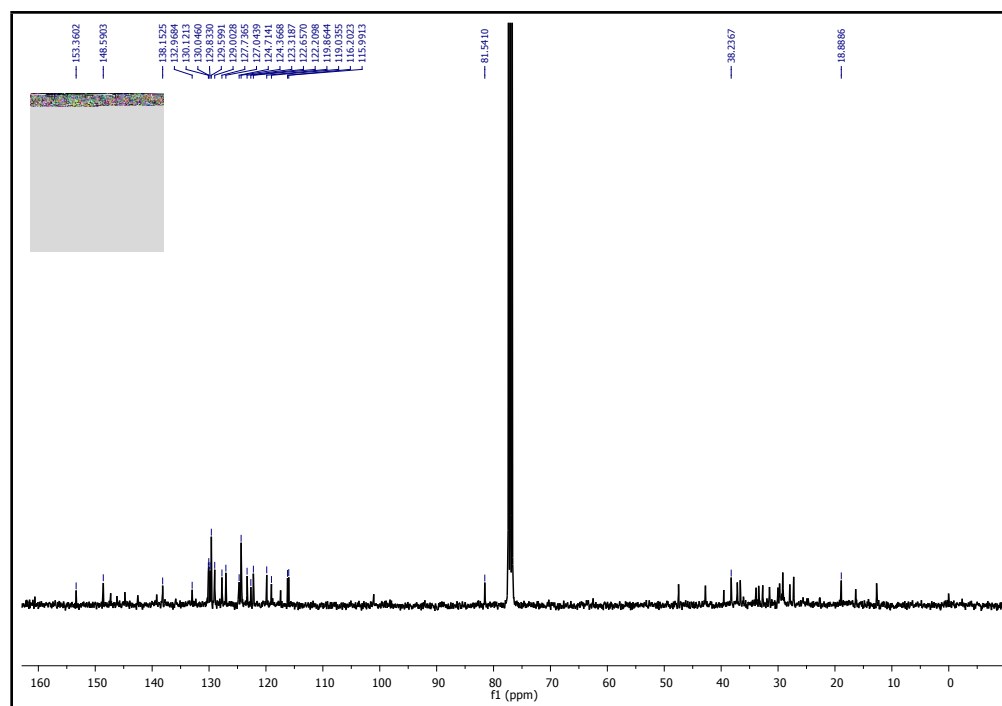

HRMS of compound 4g

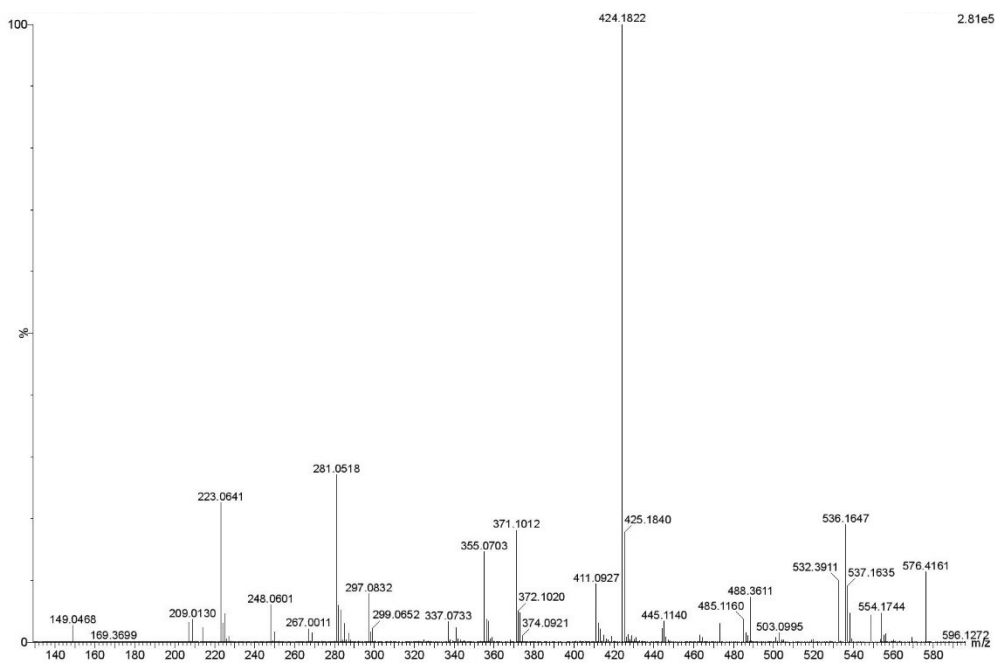

$^1\text{H}$  NMR (500 MHz,  $\text{CDCl}_3$ ,  $\text{Me}_4\text{Si}$ , ppm) of compound 4h

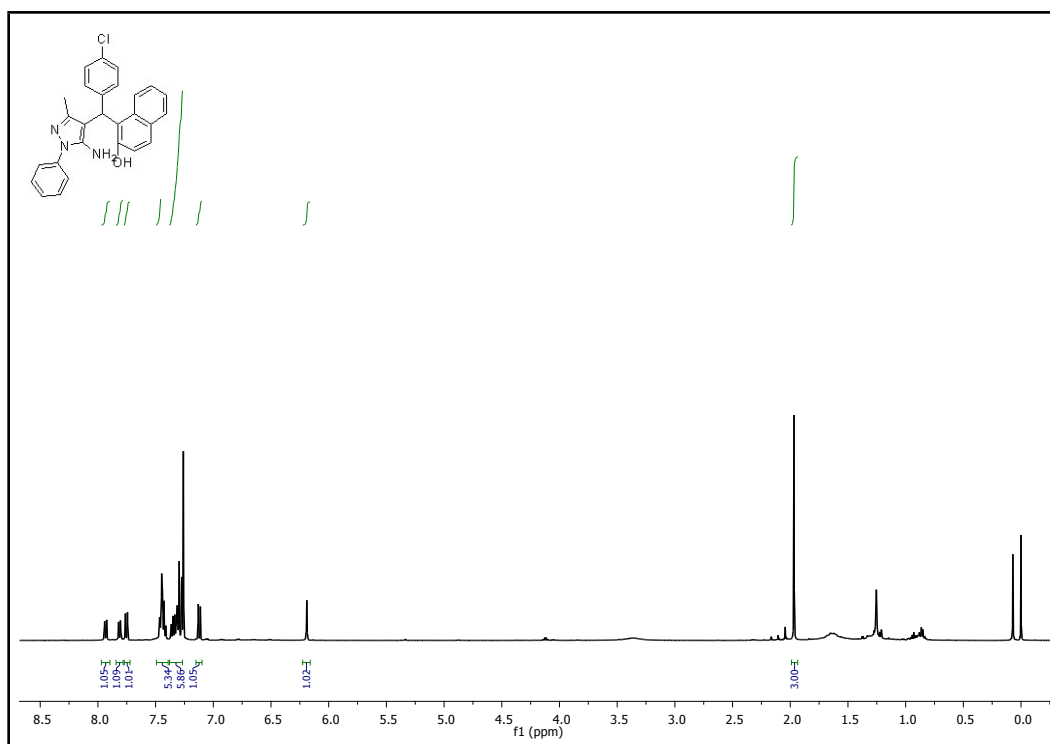

$^{13}\text{C}$  NMR (126 MHz,  $\text{CDCl}_3$ ) of compound 4h

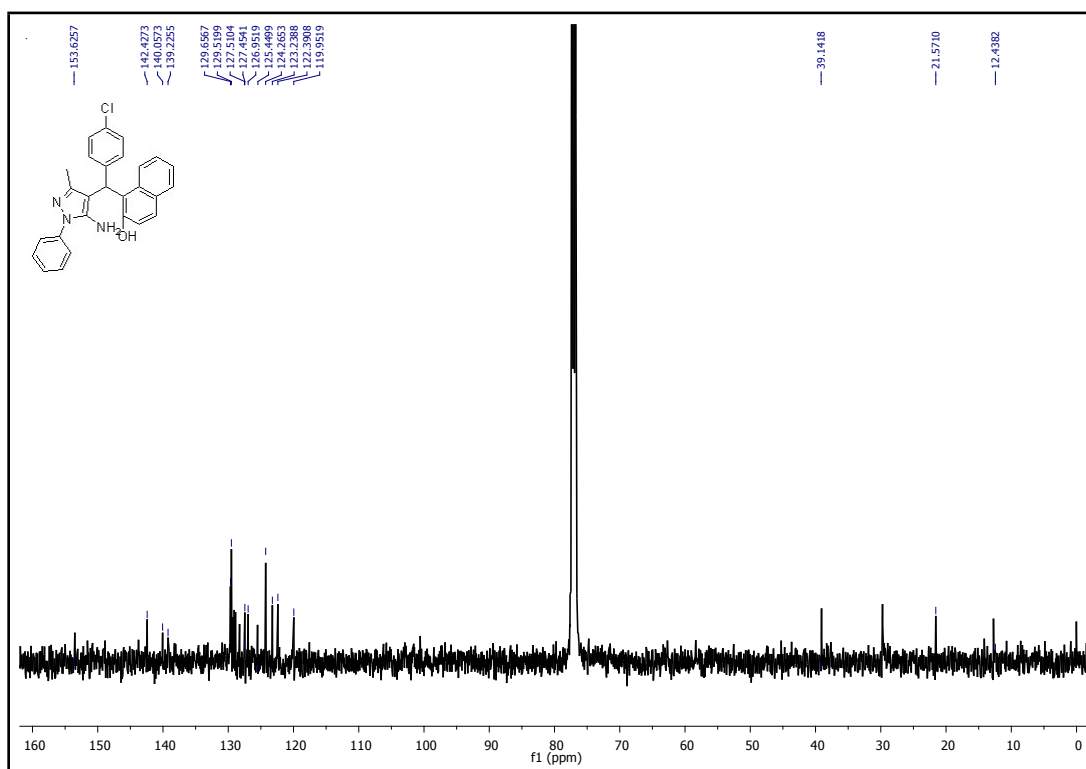

# HRMS of compound 4h

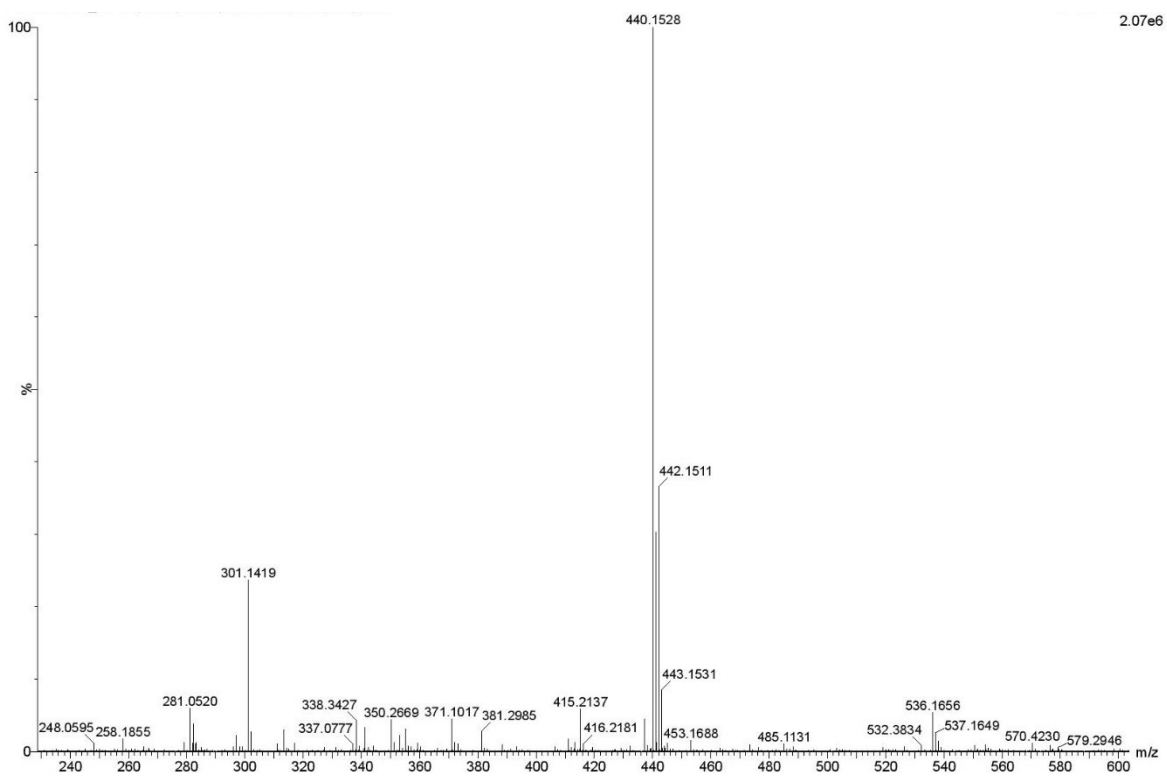

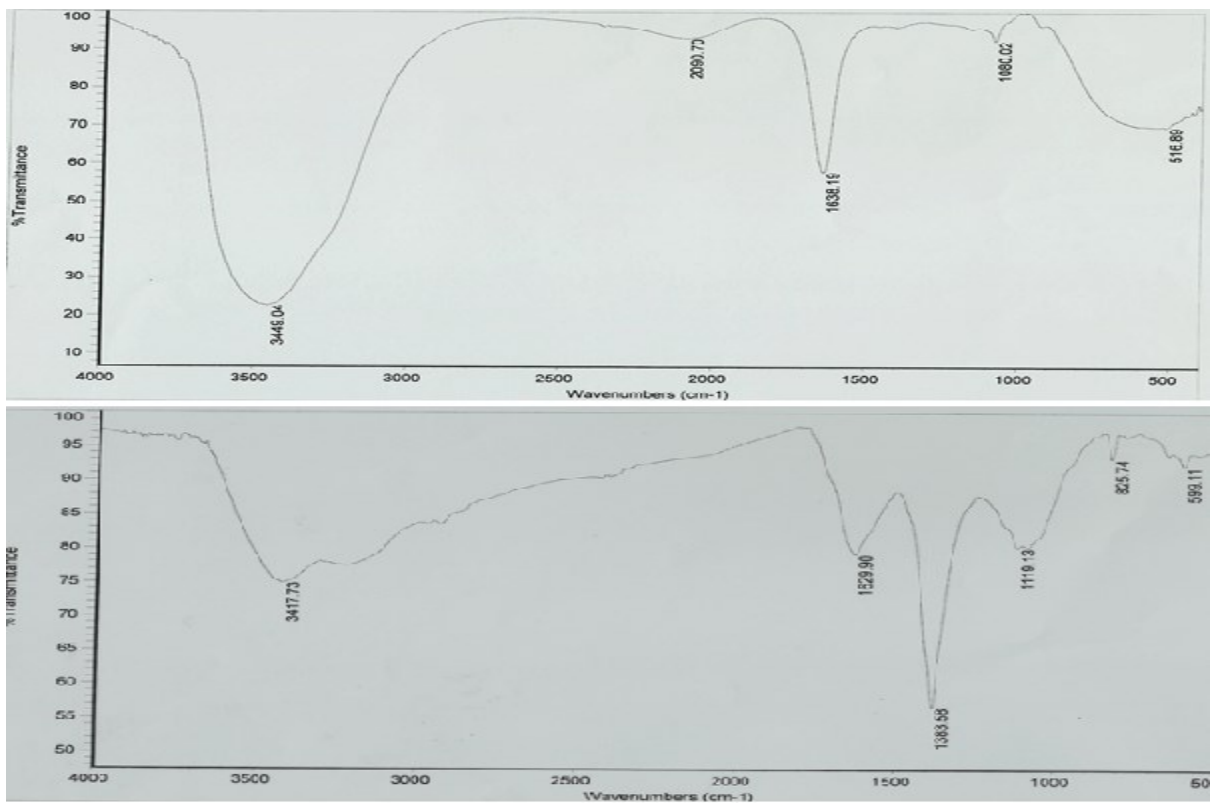

**Figure** : Fourier transform infrared spectrum of (A) Cell free supernatant of *Streptomyces* sp RAB 10 and (B) AgNPs synthesized by Cell free supernatant of *Streptomyces* sp RAB 10.
